# Supplementary material for: Validierung eines Fragebogens zur umfassenden Operationalisierung von Wohlbefinden
Source: Atypon-hosted journal article supplement (doi:10.1026/0012-1924/a000174), 2017-03-10
Supplement: 0012-1924_a000174_esm1.pdf [file 0012-1924_a000174_esm1.pdf]

*Elektronisches Supplement 1. Demographische Informationen der Gesamtstichprobe*

| Stichprobe ( <i>N</i> = 1 040)       | Häufigkeiten     |
|--------------------------------------|------------------|
| Frauen                               | 678 (65 %)       |
| Männer                               | 321 (31 %)       |
|                                      | 41 fehlend (4 %) |
| 16–24                                | 415 (40 %)       |
| 25–39                                | 359 (35 %)       |
| 40–59                                | 182 (18 %)       |
| 60+                                  | 42 (4 %)         |
|                                      | 42 fehlend (4 %) |
| österreichisch                       | 595 (57 %)       |
| deutsch                              | 271 (26 %)       |
| italienisch                          | 96 (9 %)         |
| andere Nationalitäten                | 32 (3. %)        |
|                                      | 46 fehlend (4 %) |
| single                               | 410 (39 %)       |
| in Partnerschaft                     | 365 (35 %)       |
| verheiratet                          | 179 (17 %)       |
| geschieden                           | 32 (3 %)         |
| verwitwet                            | 8 (1 %)          |
|                                      | 46 fehlend (4 %) |
| nein                                 | 774 (74 %)       |
| ja                                   | 224 (22 %)       |
|                                      | 42 fehlend (4 %) |
| Reifezeugnis                         | 408 (39 %)       |
| Universitätsabschluss                | 372 (36 %)       |
| Pflichtschulabschluss                | 82 (8 %)         |
| Berufsausbildung/Lehre abgeschlossen | 72 (7 %)         |
| Fachhochschulabschluss               | 59 (6 %)         |
| keinen Abschluss/sonstiges           | 6 (1 %)          |
|                                      | 41 fehlend (4 %) |
